# Supplementary material for: Analysis and suppression of scattering interference for arsenic using dispersive atomic fluorescence spectrometry based on an ultraviolet digital micromirror device spectrometer
Source: Royal Society of Chemistry journal article supplement (doi:10.1039/d2ja00123c), 2022-01-01
Supplement: d2ja00123c6.pdf [file d2ja00123c6.pdf]

## Supporting information for

### Analysis and suppression of scattering interference for arsenic using a dispersive atomic fluorescence spectrometry based on ultraviolet digital micromirror device spectrometer

Hongxia Wang,<sup>1</sup> Liuzhen Si,<sup>1</sup> Chunsheng Li,<sup>1a)</sup> Zhiheng Zhou,<sup>2</sup> Di Tian<sup>1a)</sup>

<sup>1</sup>College of Instrumentation & Electrical Engineering, Jilin University, 938 Ximinzhu Avenue, Changchun 130061, P. R. China

<sup>2</sup>Beijing Reegung Instrument Co., Ltd, Beijing 102206, P. R. China

a) Author to whom correspondence should be addressed: tiandi@jlu.edu.cn and lics@jlu.edu.cn.

#### 1. The influence of instrument parameters on ISI

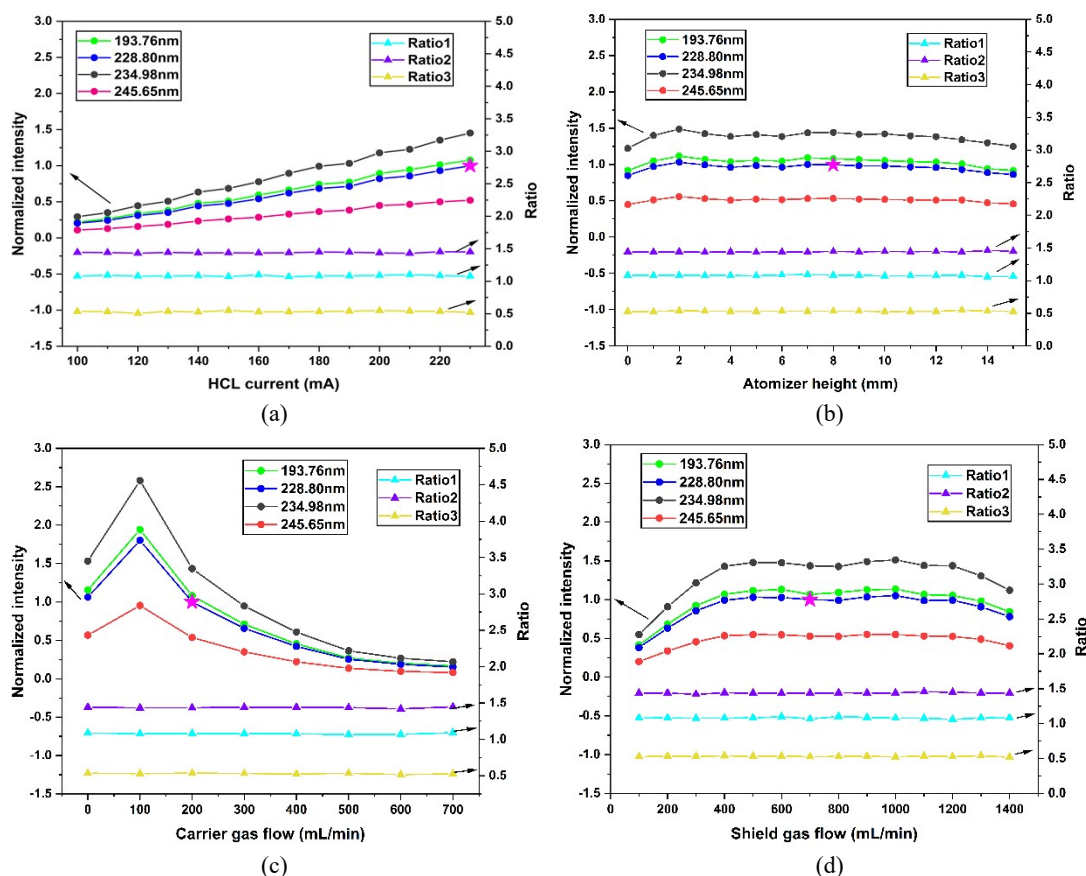

Fig. S-1 Influence of instrument parameters on ISI (a) HCL current; (b) atomizer height; (c) carrier gas flow; (d) shield gas flow.
