# Supplementary figures and images for: Analysis and suppression of scattering interference for arsenic using dispersive atomic fluorescence spectrometry based on an ultraviolet digital micromirror device spectrometer
Source: Royal Society of Chemistry journal article supplement (doi:10.1039/d2ja00123c), 2022-01-01

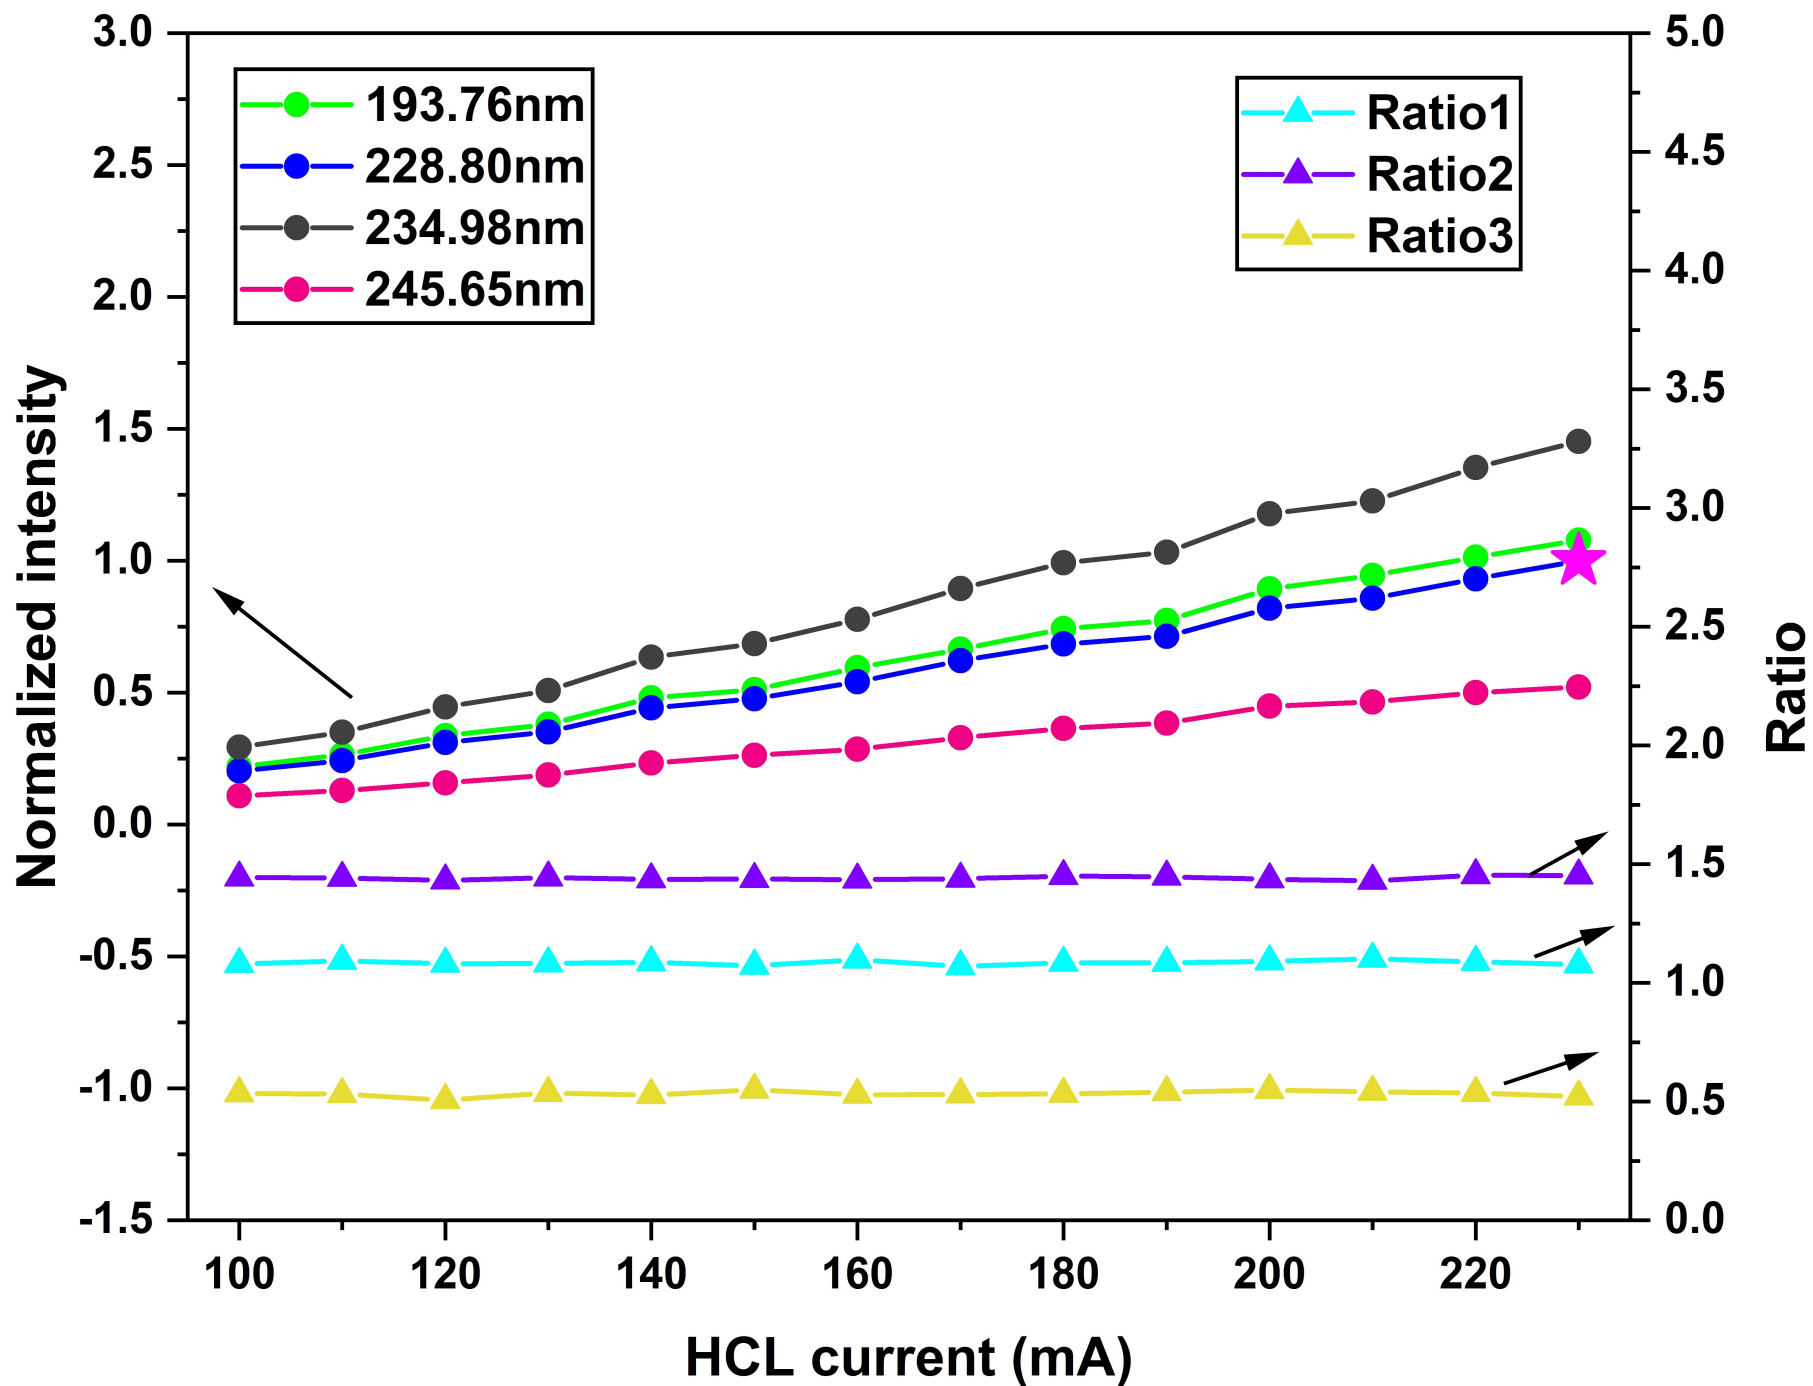

Supplement: d2ja00123c2.pdf [file d2ja00123c2.pdf]

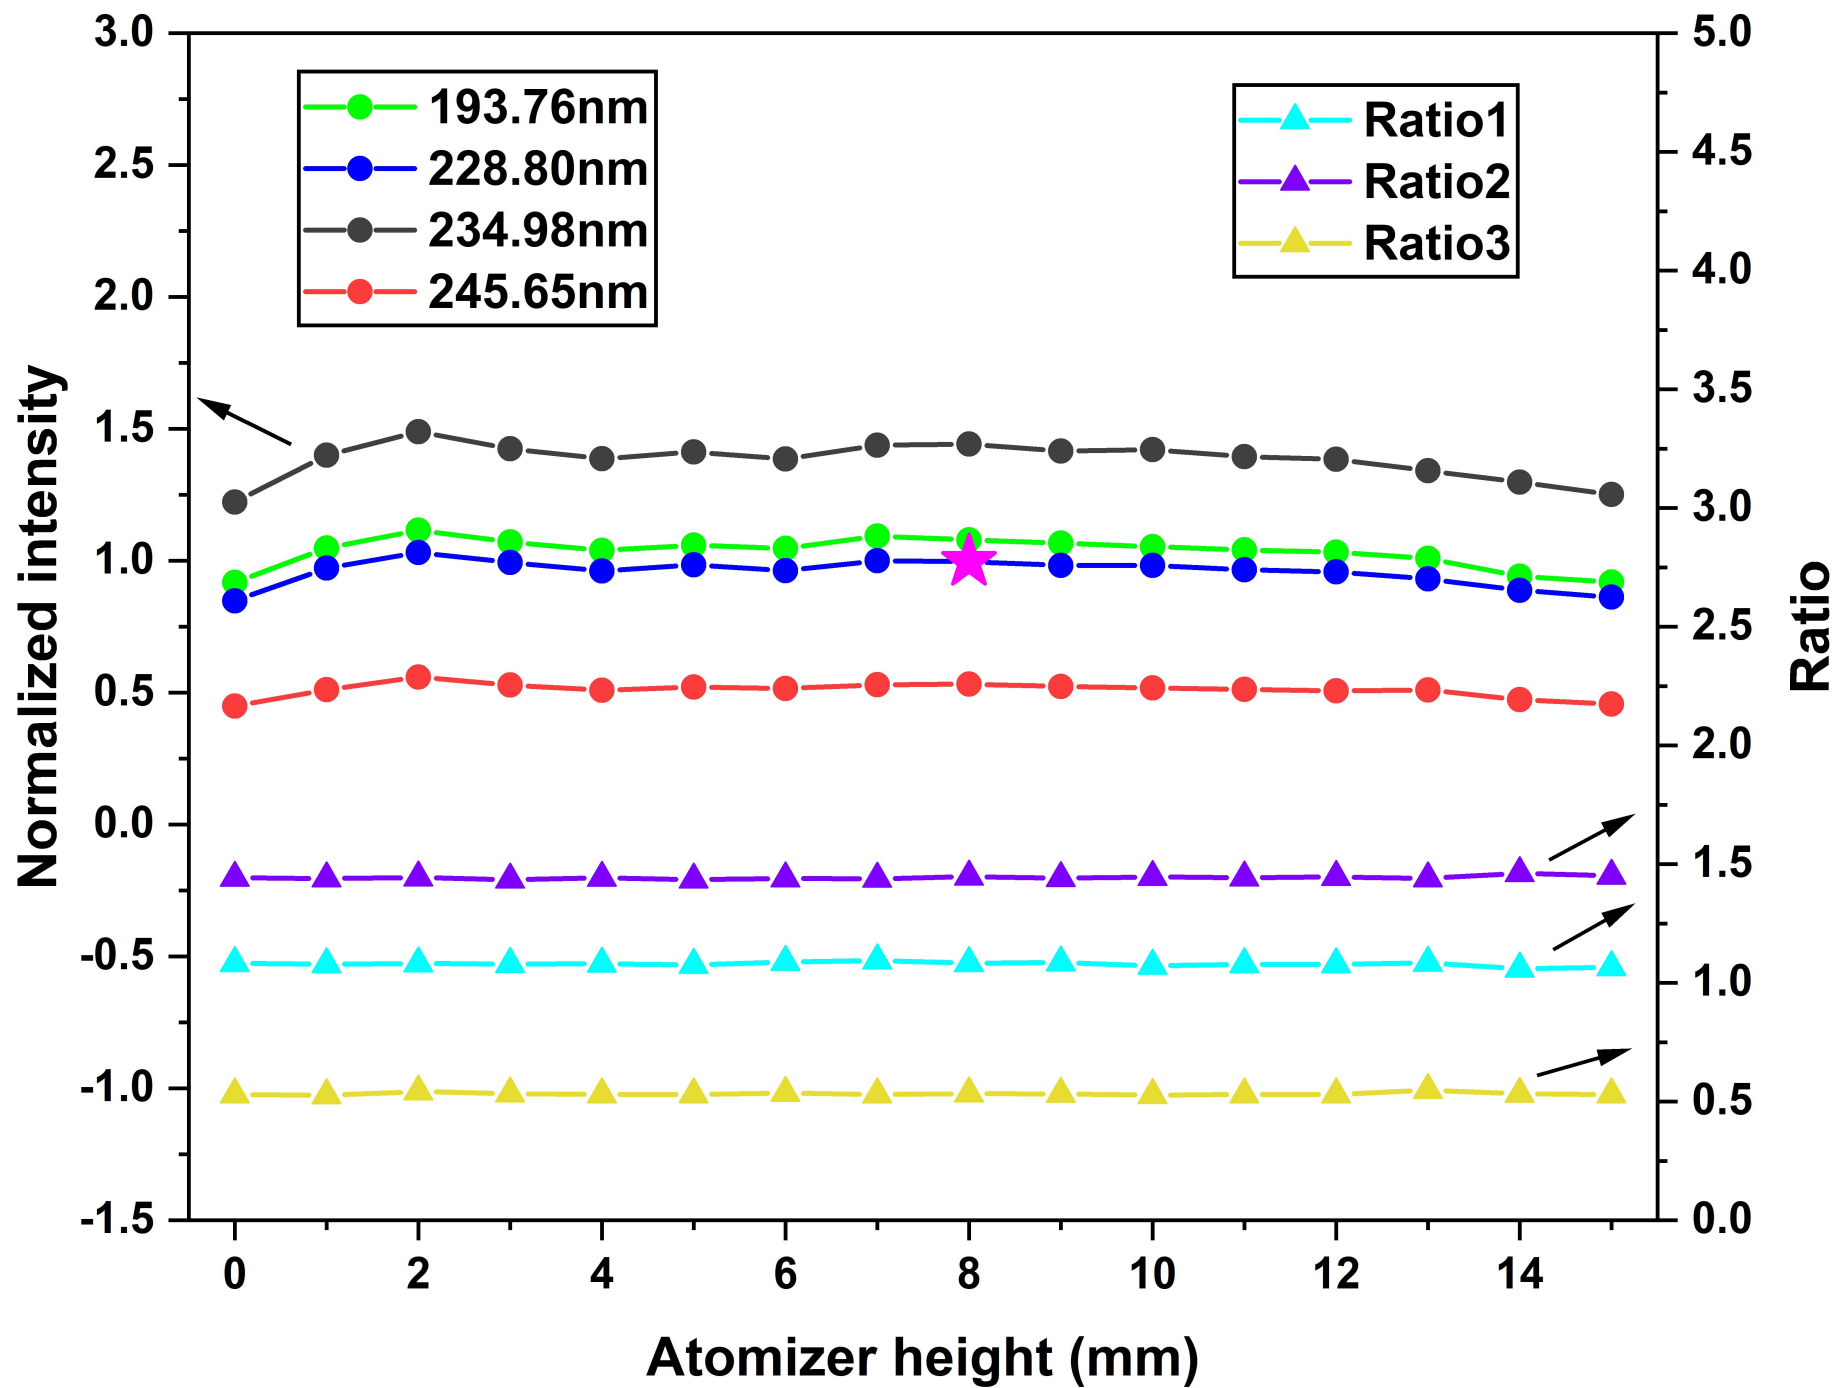

Supplement: d2ja00123c3.pdf [file d2ja00123c3.pdf]

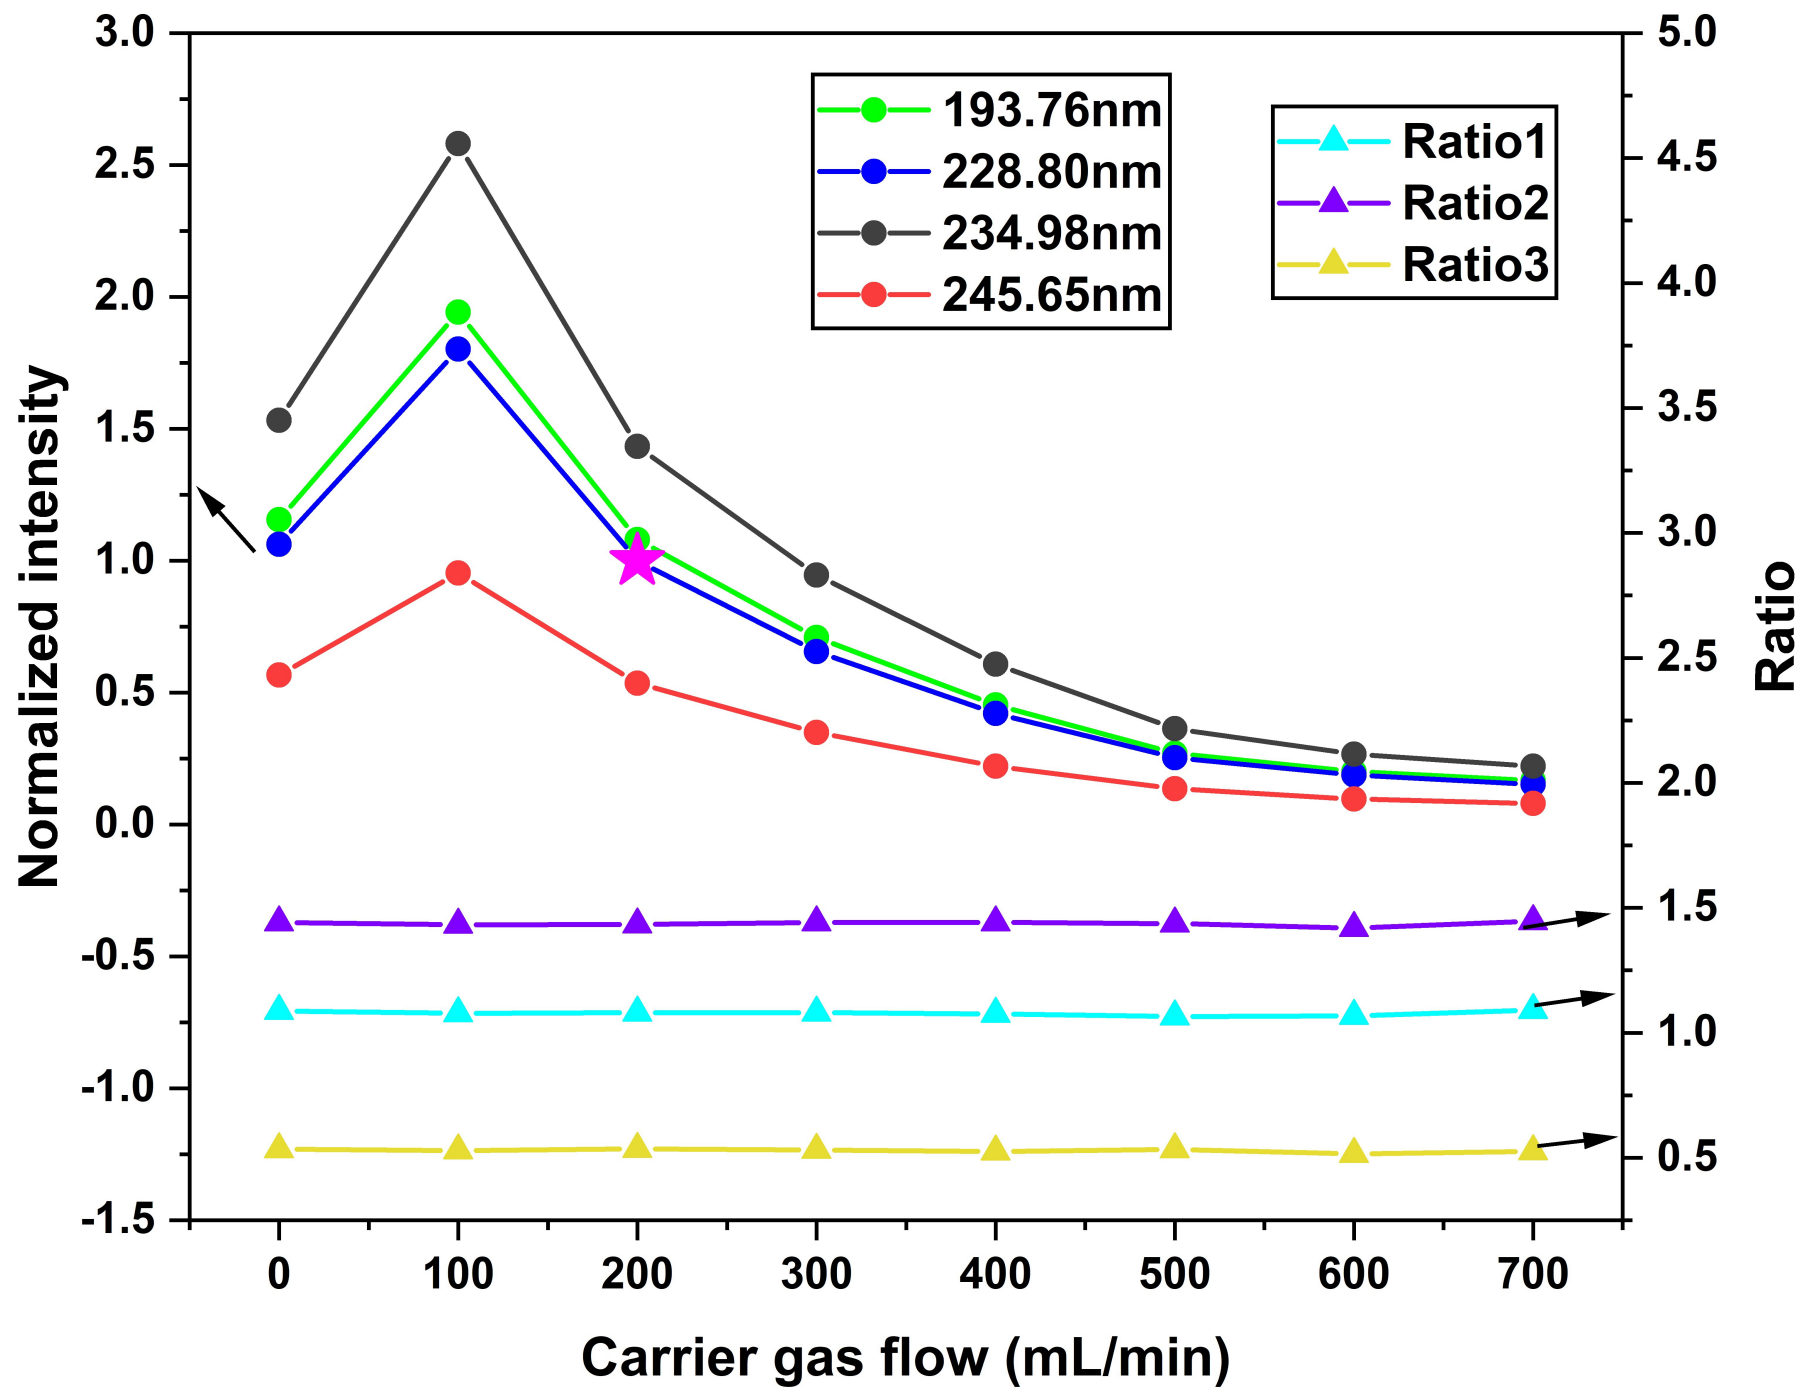

Supplement: d2ja00123c4.pdf [file d2ja00123c4.pdf]

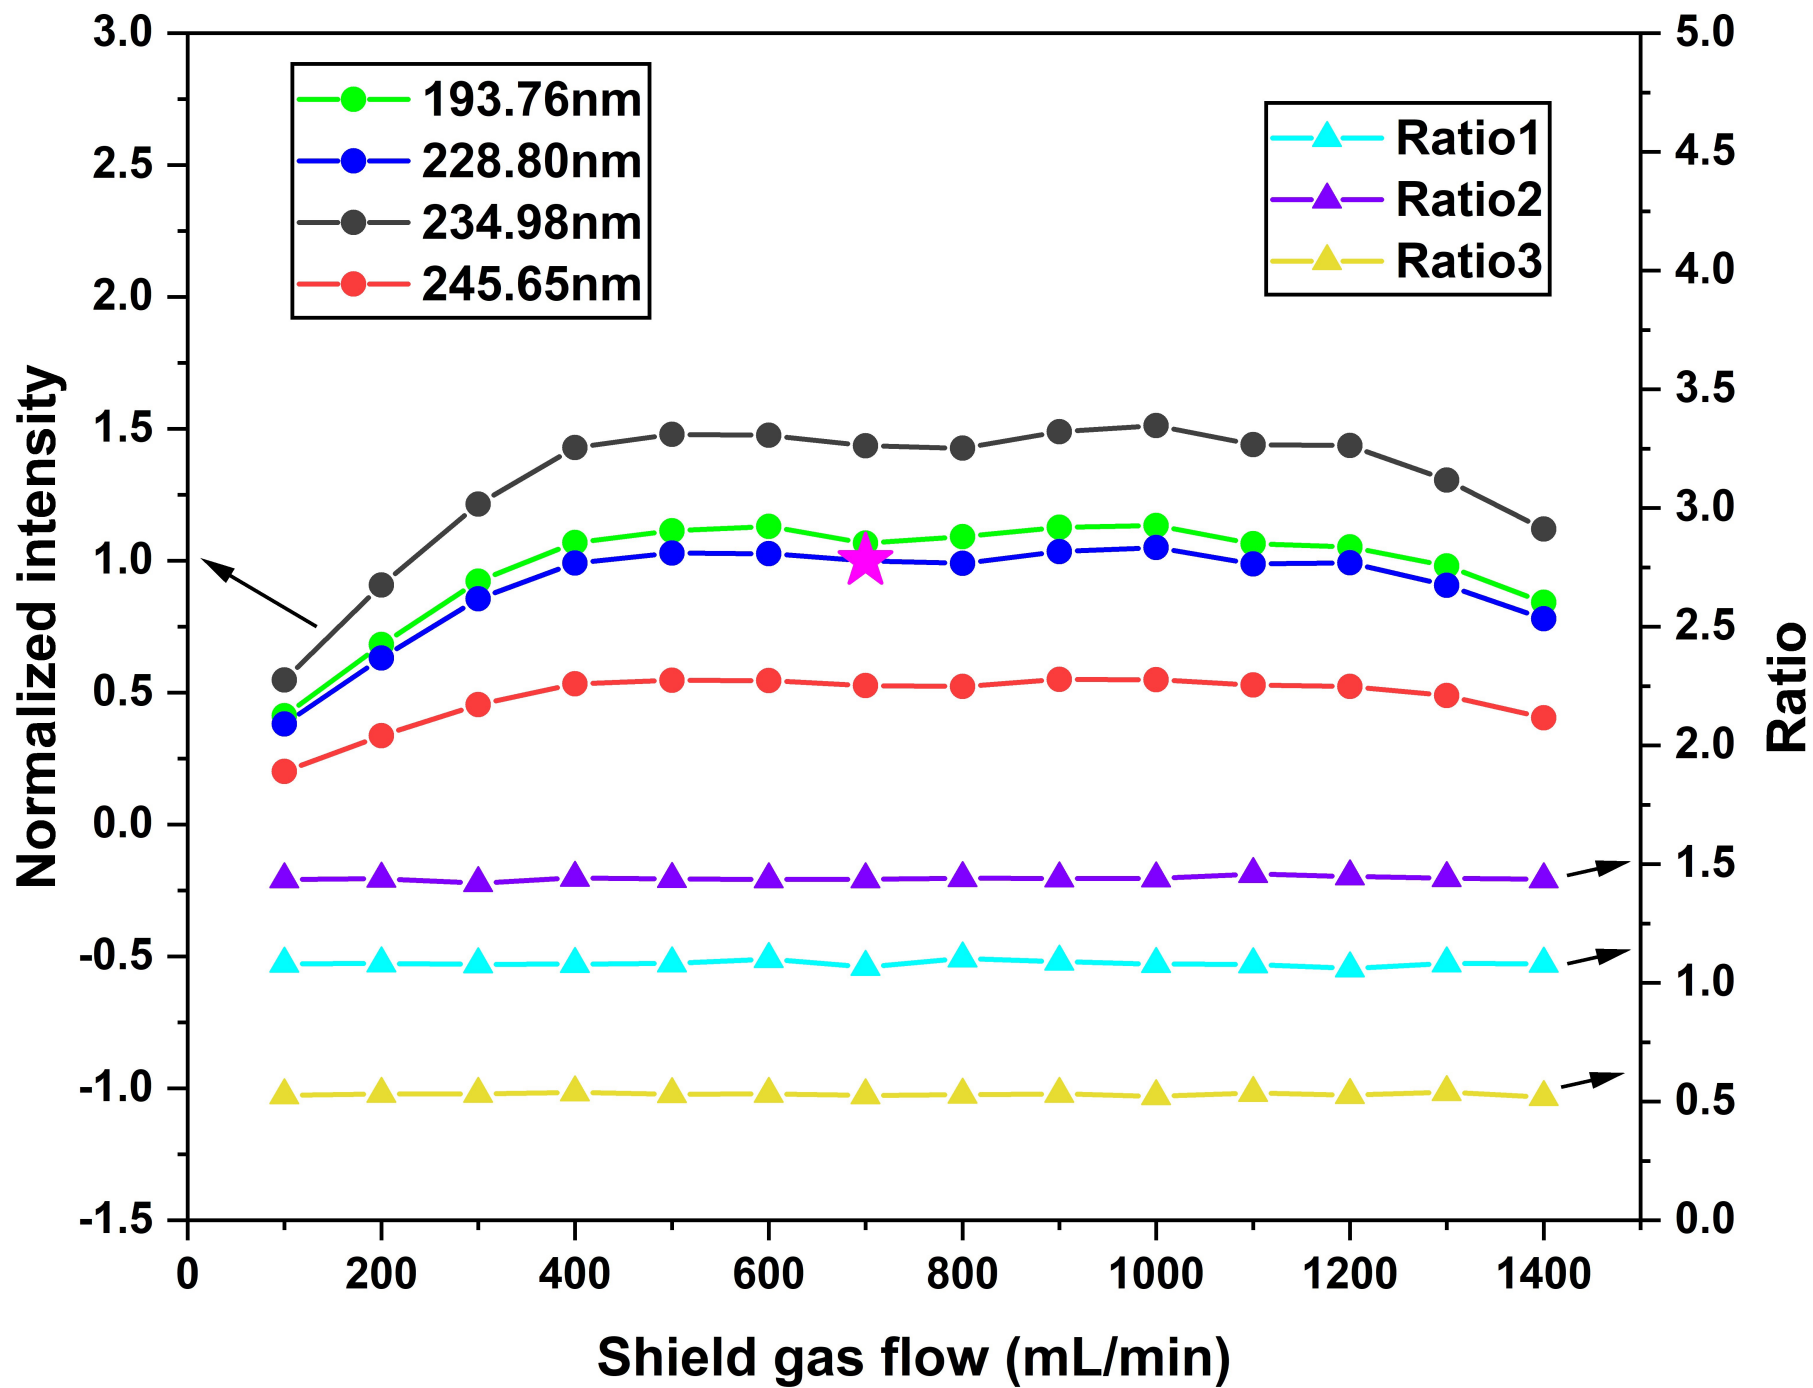

Supplement: d2ja00123c5.pdf [file d2ja00123c5.pdf]
